# Supplementary material for: Efficient electrocatalytic conversion of CO2 to syngas for the Fischer–Tropsch process using a partially reduced Cu3P nanowire
Source: Royal Society of Chemistry journal article supplement (doi:10.1039/d1ta03854k), 2021-01-01
Supplement: d1ta03854k1.pdf [file d1ta03854k1.pdf]

## Supporting Information

### **Efficient electrocatalytic conversion of CO<sub>2</sub> to syngas for Fischer-Tropsch process by partially reduced Cu<sub>3</sub>P nanowire**

Bing Chang<sup>a</sup>, Xia-Guang Zhang<sup>b</sup>, Zhaojun Min<sup>b</sup>, Weiwei Lu<sup>c</sup>, Zhiyong Li<sup>b</sup>, Jikuan Qiu<sup>b</sup>, Huiyong Wang<sup>b</sup>, Jing Fan<sup>a\*</sup>, and Jianji Wang<sup>b\*</sup>

<sup>a</sup> School of Environment, Key Laboratory for Yellow River and Huai River Water Environment and Pollution Control, Ministry of Education, Henan Normal University, Xinxiang, Henan, 453007, People's Republic of China

<sup>b</sup> School of Chemistry and Chemical Engineering, Key Laboratory of Green Chemical Media and Reactions, Ministry of Education, Henan Normal University, Xinxiang, Henan, 453007, People's Republic of China

<sup>c</sup> School of Chemical Engineering and Pharmaceutics, Henan University of Science and Technology, Luoyang, Henan, 471023, People's Republic of China

\* Corresponding authors

E-mail address: [fanjing@htu.edu.cn](mailto:fanjing@htu.edu.cn) (Prof. J. Fan) and [jwang@htu.edu.cn](mailto:jwang@htu.edu.cn) (Prof. J. Wang)

## **Table of Contents**

|                  |    |
|------------------|----|
| Fig. S1-S21..... | 3  |
| Table S1-S3..... | 11 |
| References.....  | 13 |

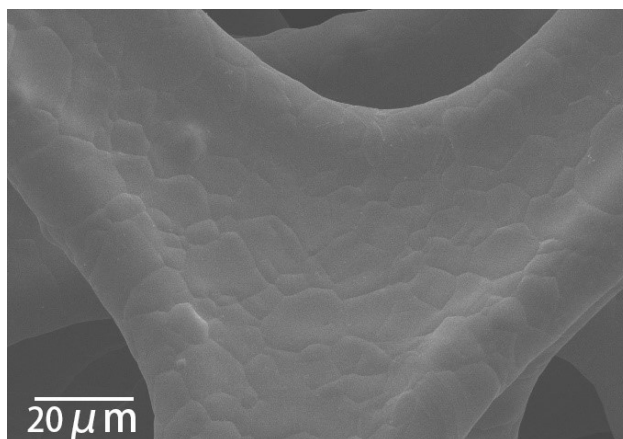

**Fig. S1.** SEM image of the bare copper foam.

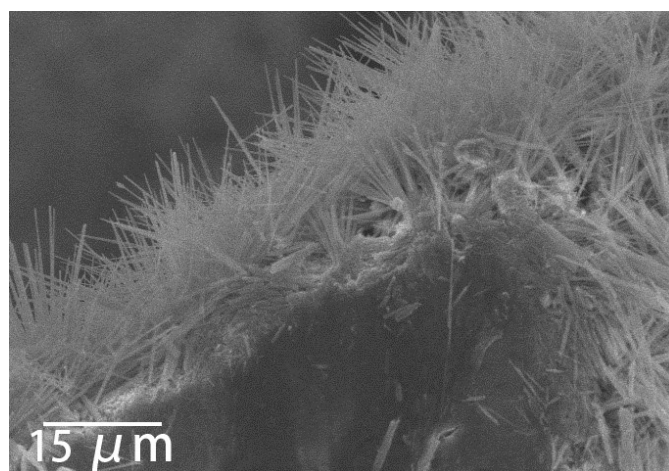

**Fig. S2.** Cross-section SEM image of the R-Cu<sub>3</sub>P/Cu.

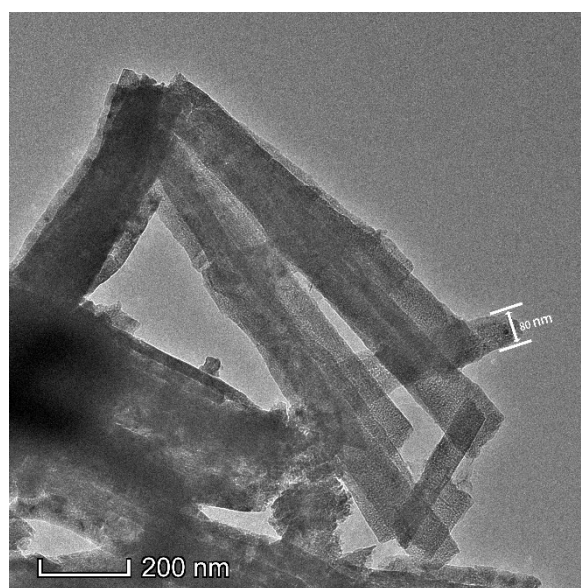

**Fig. S3.** TEM image of the R-Cu<sub>3</sub>P/Cu.

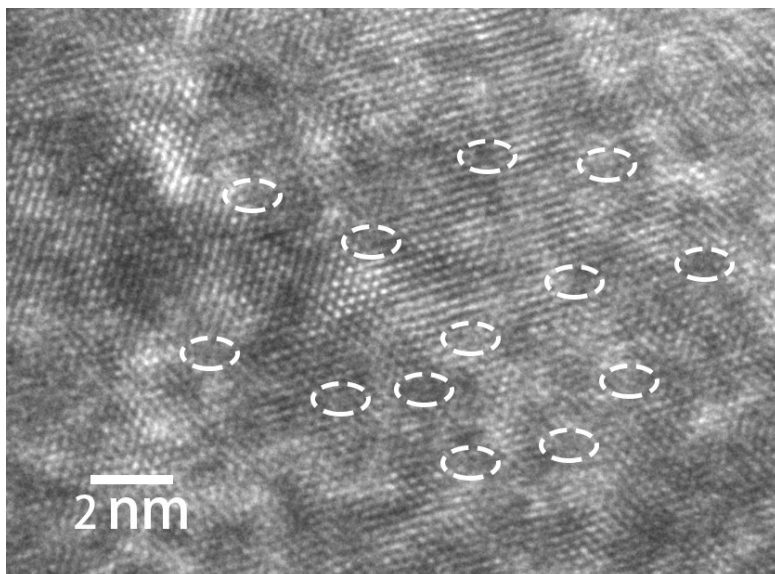

**Fig. S4.** HR-TEM partial enlarged image of R-Cu<sub>3</sub>P/Cu.

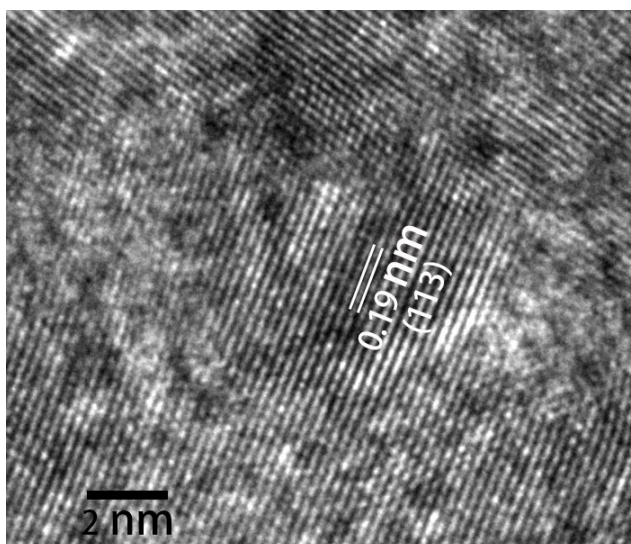

**Fig. S5.** HR-TEM image of the Cu<sub>3</sub>P/Cu.

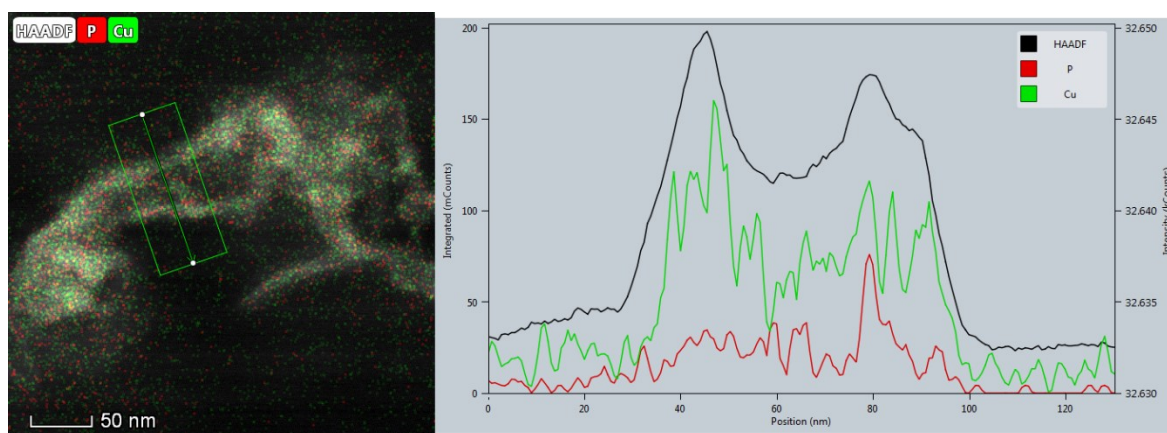

**Fig. S6.** HAADF image and corresponding EDS line scanning spectrum of R-Cu<sub>3</sub>P/Cu.

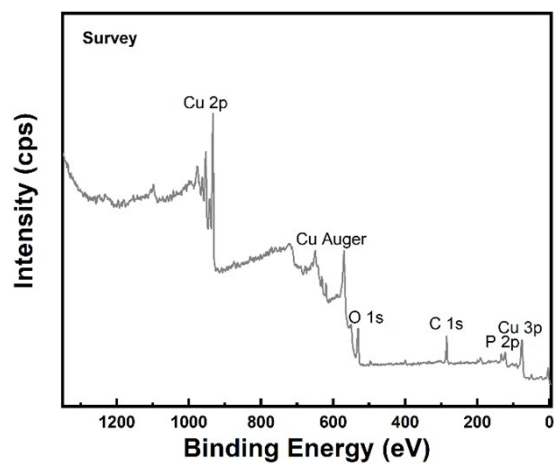

**Fig. S7.** XPS survey spectrum of R-Cu<sub>3</sub>P/Cu.

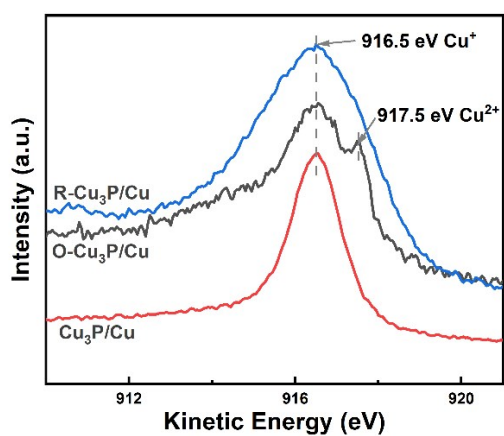

**Fig. S8.** AES spectra of Cu<sub>3</sub>P/Cu, O-Cu<sub>3</sub>P/Cu, and R-Cu<sub>3</sub>P/Cu.

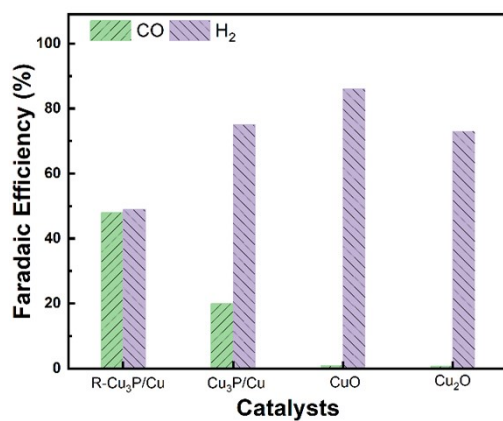

**Fig. S9.** CO and H<sub>2</sub> FE of R-Cu<sub>3</sub>P/Cu, Cu<sub>3</sub>P/Cu, CuO, and Cu<sub>2</sub>O at -0.625 V vs. RHE.

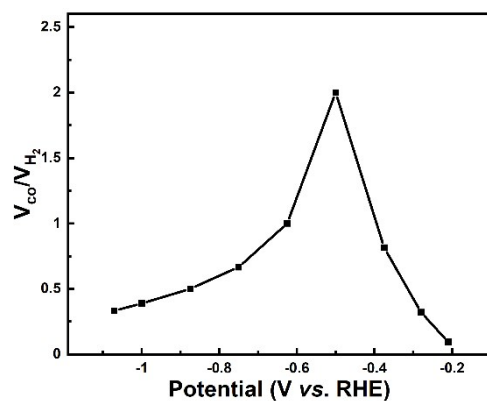

**Fig. S10.** The ratio of  $V_{CO}/V_{H_2}$  at different applied potentials.

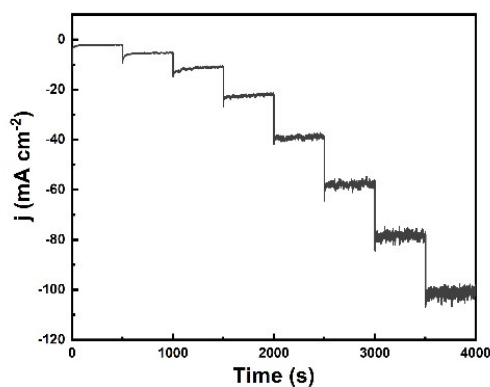

**Fig. S11.** Multi-potential process of R-Cu<sub>3</sub>P/Cu in CO<sub>2</sub>RR process. Each applied potential last for 500 s.

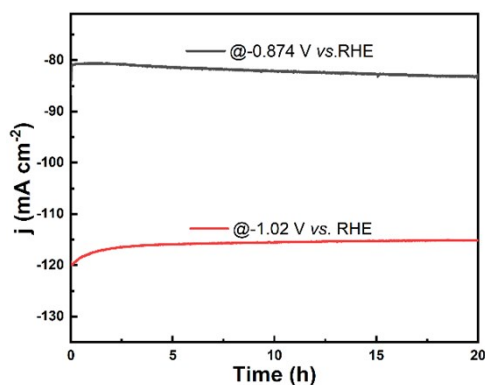

**Fig. S12.** Time-dependent current plots of R-Cu<sub>3</sub>P/Cu in CO<sub>2</sub>-saturated 0.5 M NaHCO<sub>3</sub> solution at preset potentials of -0.874 V (CO/H<sub>2</sub>: 1/2) and -1.02 V (CO/H<sub>2</sub>: 2/5).

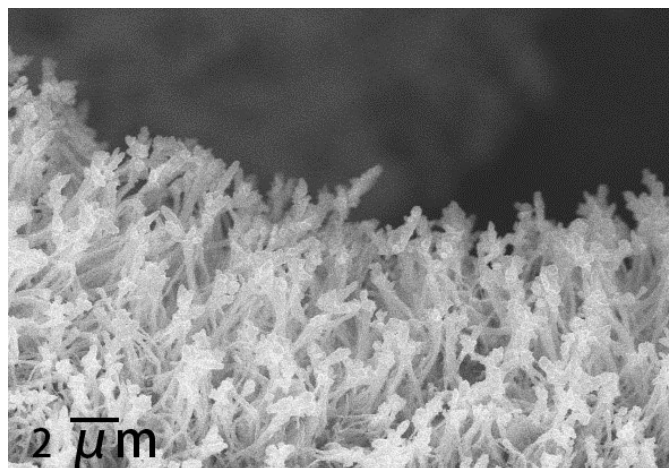

**Fig. S13.** SEM image of R-Cu<sub>3</sub>P/Cu after 20 h potentiostatic electrolysis.

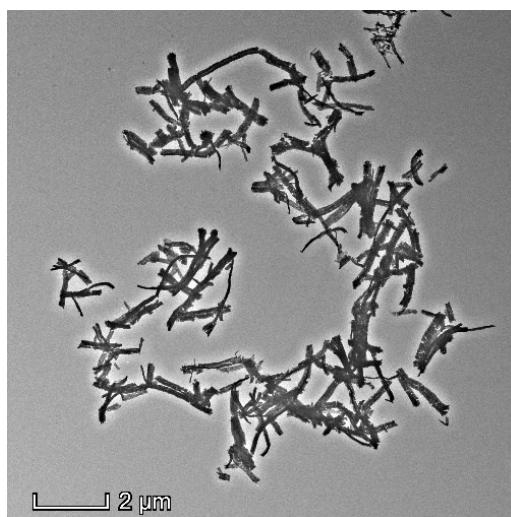

**Fig. S14.** TEM image of R-Cu<sub>3</sub>P/Cu after long-term electrolysis.

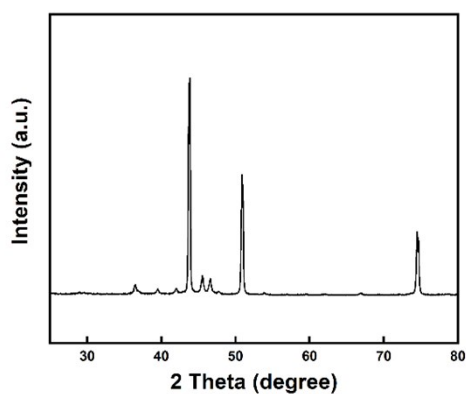

**Fig. S15.** XRD pattern of R-Cu<sub>3</sub>P/Cu after long-term electrolysis.



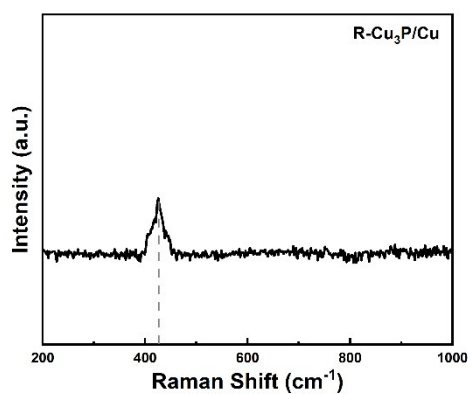

**Fig. S16.** Raman spectrum of R-Cu<sub>3</sub>P/Cu after long-term electrolysis.

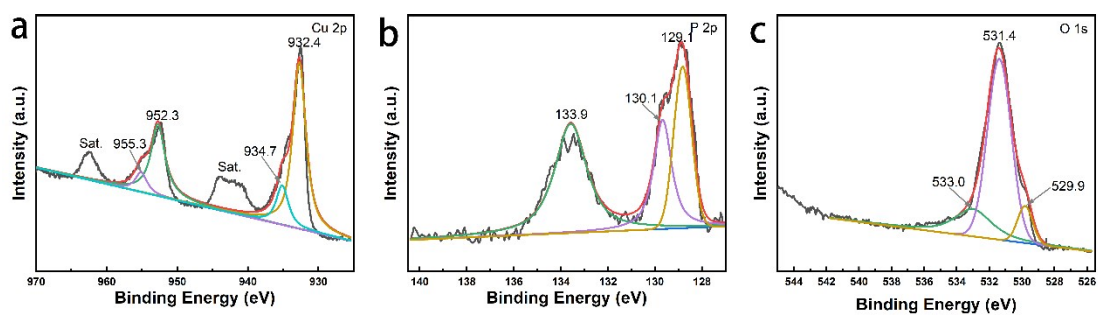

**Fig. S17.** High-resolution XPS spectra of R-Cu<sub>3</sub>P/Cu after long-term electrolysis.



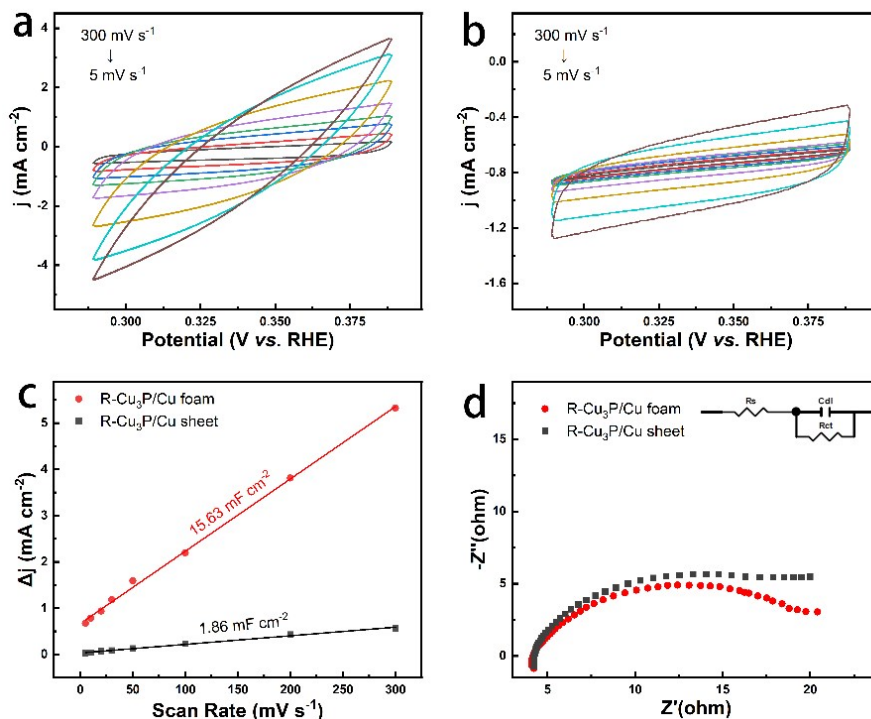

**Fig. S18.** CV curves of R-Cu<sub>3</sub>P/Cu foam (a) and sheet (b) at different scan rates: 5, 10, 20, 30, 50, 100, 200, and 300 mV s<sup>-1</sup> from inside to outside. (c) Capacitive current at 0.339 V (vs. RHE) as a function of the scan rate for R-Cu<sub>3</sub>P/Cu foam and sheet ( $\Delta j = j_a - j_c$ ). (d) Nyquist plots of R-Cu<sub>3</sub>P/Cu foam and sheet in the frequency range of 0.1-100 KHz. Inset: Randles' equivalent circuit used for fitting the experimental impedance data. Note: solution resistance ( $R_s$ ), electrical double-layer capacitance ( $C_{dl}$ ), charge transfer resistance ( $R_{ct}$ ).

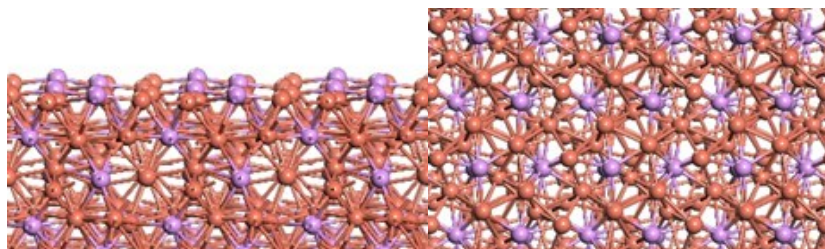

**Fig. S19.** Side and vertical view of the optimized structures of Cu<sub>3</sub>P.

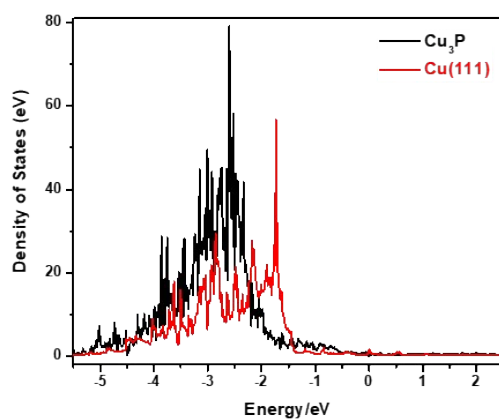

**Fig. S20.** DOS of  $d$ -electrons for the surface Cu atoms of  $\text{Cu}_3\text{P}$  and Cu (111) surface.

The energy is relative to the Fermi level.

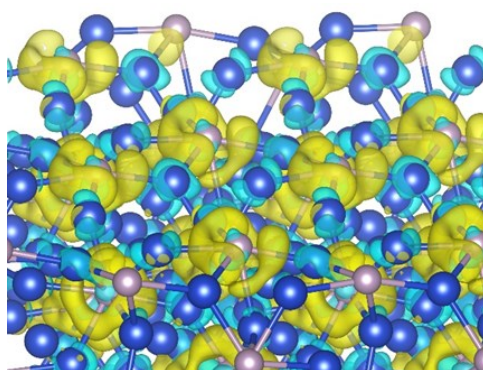

**Fig. S21.** Charge density difference of Cu and P on the bulk  $\text{Cu}_3\text{P}$  as defined by:  $\Delta\rho = \rho_{\text{Cu}_3\text{P}} - \rho_{\text{Cu}} - \rho_{\text{P}}$ . The yellow and green area represents electron accumulation and depletion, respectively.

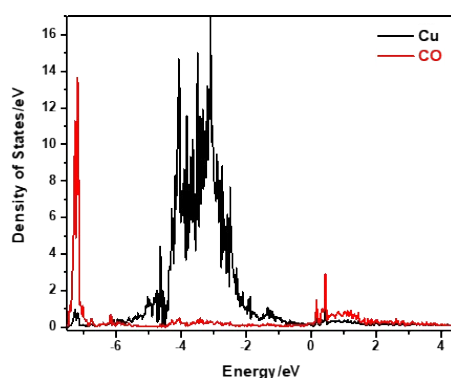

**Fig. S22.** DOS of  $d$ -electrons for the surface Cu atoms of  $\text{Cu}_3\text{P}$  and  $s, p$ -electrons for the adsorbed CO. The energy is relative to the Fermi level.

**Table S1.** Comparison with other reports on the CO<sub>2</sub>RR to produce syngas.

| Catalyst                                                               | Electrolyte                                                              | Current density<br>(mA cm <sup>-2</sup> )<br>(CO/H <sub>2</sub> ) | Tuneable ratio<br>CO/H <sub>2</sub> | Stability<br>(h) | Ref. |
|------------------------------------------------------------------------|--------------------------------------------------------------------------|-------------------------------------------------------------------|-------------------------------------|------------------|------|
| AgP <sub>2</sub><br>nanocrystals                                       | 0.5 M KHCO <sub>3</sub>                                                  | 0.28 (1:3)<br>2.46 (1:1)                                          | 1:3-5:1                             | 12               | (1)  |
| Ag doped<br>Co <sub>3</sub> O <sub>4</sub>                             | 0.1 M KHCO <sub>3</sub>                                                  | ~ 7 (1:3)                                                         | 1:4-5:4                             | 10               | (2)  |
| silver<br>nanowires                                                    | 0.5 M KHCO <sub>3</sub>                                                  | 4 (1:1)<br>22 (3:2)                                               | 1:1-4:1                             | 12               | (3)  |
| Ru (II)<br>polypyridyl                                                 | 0.5 M NaHCO <sub>3</sub>                                                 | 2.5 (1:4)                                                         | 1:4-2:1                             | 2                | (4)  |
| MoSeS alloy                                                            | 4 mol% EmimBF <sub>4</sub><br>96 mol% H <sub>2</sub> O                   | -                                                                 | 1:1                                 | 10               | (5)  |
| Zn <sub>x</sub> Cd <sub>1-x</sub> S-<br>Amine                          | 0.5 M NaHCO <sub>3</sub>                                                 | ~ 6 (1:1)                                                         | 0-19.7                              | 10               | (6)  |
| Co and Ni<br>Single-Atom                                               | 0.5 M KHCO <sub>3</sub>                                                  | > 74                                                              | 0.23-2.26                           | 7                | (7)  |
| Pd/C                                                                   | 0.5 M NaHCO <sub>3</sub>                                                 | 0.3 (3:4)                                                         | 1:4-3:4                             | -                | (8)  |
| γ-In <sub>2</sub> Se <sub>3</sub>                                      | 30 wt%<br>[Bmim]PF <sub>6</sub><br>65 wt% MeCN<br>5 wt% H <sub>2</sub> O | 90.1 (1:1)                                                        | 1:3-24:1                            | 25               | (9)  |
| SnO <sub>2</sub> /CuS                                                  | 0.1 M KHCO <sub>3</sub>                                                  | ~5 (1:1)<br>~3 (1:3)                                              | 0.11-3.86                           | 24               | (10) |
| Zn-Ni                                                                  | 0.1 M KCl                                                                | 8.4 (11:9)                                                        | -                                   | 50               | (11) |
| Au/TiNS                                                                | 0.5 M KHCO <sub>3</sub>                                                  | -                                                                 | 0.3-3                               | -                | (12) |
| PdH/TMN                                                                | 0.5 M NaHCO <sub>3</sub>                                                 | 0.4 (3:4)                                                         | 0.16-0.74                           | -                | (13) |
| CdS <sub>x</sub> Se <sub>1-x</sub><br>nanorods                         | 0.1 M KHCO <sub>3</sub>                                                  | 27.1                                                              | 1:4-4:1                             | 10               | (14) |
| Co <sub>3</sub> O <sub>4</sub> -Cdots<br>C <sub>3</sub> N <sub>4</sub> | 0.5 M KHCO <sub>3</sub>                                                  | 0.25 (1:1)                                                        | 0.07:1-4:1                          | 30               | (15) |

|                                                           |                                                     |                                                        |            |      |              |
|-----------------------------------------------------------|-----------------------------------------------------|--------------------------------------------------------|------------|------|--------------|
| MoS <sub>2</sub>                                          | EMIM-BF <sub>4</sub><br>solution (94 mol%<br>water) | 61 (4:1)                                               | 1:2-4:1    | 10   | (16)         |
| Zn                                                        | 0.1 M KHCO <sub>3</sub>                             | 11.36 (7:6)                                            | 1:5-2.31:1 | 9.5  | (17)         |
| Fe-N-C                                                    | 0.5 M NaHCO <sub>3</sub>                            | -                                                      | 0-4:1      | 10   | (18)         |
| Cu-enriched<br>Au                                         | 0.5 M KHCO <sub>3</sub>                             | 30 (1:1)                                               | -          | 8    | (19)         |
| Cu-In alloys                                              | 0.1 M KHCO <sub>3</sub>                             | -                                                      | 1:18-1:2.6 | 16.7 | (20)         |
| Cu                                                        | 0.1 M KHCO <sub>3</sub>                             | ~7 (1:1)                                               | 9:16-32:1  | -    | (21)         |
| carbon-<br>supported<br>Cu/In <sub>2</sub> O <sub>3</sub> | 0.5 M KHCO <sub>3</sub>                             | 4.6 (1:4)<br>12.7(1:0.4)                               | 1:4-1:0.4  | 5    | (22)         |
| R-Cu <sub>3</sub> P/Cu                                    | 0.5 M NaHCO <sub>3</sub>                            | 36.3 (1:1)<br>82.9 (1:2)<br>115.0 (2:5)<br>130.0 (1:3) | 0.1-2.24   | > 20 | This<br>work |

---

**Table S2.** Bader charge for the surface atoms of Cu<sub>3</sub>P.

| Atom   | P     | P     | Cu   | Cu   | Cu   | Cu   | Cu   | Cu   |
|--------|-------|-------|------|------|------|------|------|------|
| Charge | -0.56 | -0.56 | 0.19 | 0.17 | 0.17 | 0.19 | 0.20 | 0.20 |

**Table S3.** Bader charge of CO<sub>2</sub> chemisorption on Cu<sub>3</sub>P surface.

| Atom   | C    | O     | O     | Tot   |
|--------|------|-------|-------|-------|
| Charge | 1.58 | -1.08 | -1.06 | -0.56 |

## References

- (1) H. Li, P. Wen, D. S. Itanze, Z. D. Hood, X. Ma, M. Kim, S. Adhikari, C. Lu, C. Dun, M. Chi, Y. Qiu and S. M. Geyer, *Nat. Commun.*, 2019, **10**, 5724.
- (2) S. -Y. Zhang, Y. -Y. Yang, Y. -Q. Zheng and H. -L. Zhu, *J. Solid State Chem.*, 2018, **263**, 44-51.
- (3) W. Xi, R. Ma, H. Wang, Z. Gao, W. Zhang and Y. Zhao, *ACS Sustain. Chem. Eng.*, 2018, **6**, 7687-7694.
- (4) P. Kang, Z. Chen, A. Nayak, S. Zhang and T. J. Meyer, *Energy Environ. Sci.*, 2014, **7**, 4007-4012.
- (5) J. Xu, X. Li, W. Liu, Y. Sun, Z. Ju, T. Yao, C. Wang, H. Ju, J. Zhu, S. Wie and Y. Xie, *Angew. Chem. Int. Ed.*, 2017, **56**, 9121-9125.
- (6) N. Meng, C. Liu, Y. Liu, Y. Yu and B. Zhang, *Angew. Chem. Int. Ed.*, 2019, **58**, 18908-18912.
- (7) Q. He, D. Liu, J. H. Lee, Y. Liu, Z. Xie, S. Hwang, S. Kattel, L. Song and J. G.

- Chen, *Angew. Chem. Int. Ed.*, 2020, **59**, 3033-3037.
- (8) W. Sheng, S. Kattel, S. Yao, B. Yan, Z. Liang, C. J. Hawxhurst, Q. Wu and J. G. Chen, *Energy Environ. Sci.*, 2017, **10**, 1180-1185.
- (9) D. Yang, Q. Zhu, X. Sun, C. Chen, W. Guo, G. Yang and B. Han, *Angew. Chem. Int. Ed.*, 2020, **59**, 2354-2359.
- (10) X. Wang, J. Lv, J. Zhang, X. L. Wang, C. Xue, G. Bian, D. Li, Y. Wang and T. Wu, *Nanoscale*, 2020, **12**, 772-784.
- (11) M. Beheshti, S. Kakooei, M. C. Ismail and S. Shahrestani, *Electrochim. Acta*, 2020, **341**, 135976.
- (12) F. Marques Mota, D. L. T. Nguyen, J. -E. Lee, H. Piao, J. -H. Choy, Y. J. Hwang and D. H. Kim, *ACS Catal.*, 2018, **8**, 4364-4374.
- (13) Y. Liu, D. Tian, A. N. Biswas, Z. Xie, S. Hwang, J. H. Lee, H. Meng and J. G. Chen, *Angew. Chem. Int. Ed.*, 2020, **59**, 11345-11348.
- (14) R. He, A. Zhang, Y. Ding, T. Kong, Q. Xiao, H. Li, Y. Liu and J. Zeng, *Adv. Mater.*, 2018, **30**, 1705872.
- (15) S. Guo, S. Zhao, X. Wu, H. Li, Y. Zhou, C. Zhu, N. Yang, X. Jiang, J. Gao, L. Bai, Y. Liu, Y. Lifshitz, S. -T. Lee and Z. Kang, *Nat. Commun.*, 2017, **8**, 1828.
- (16) K. Lv, C. Teng, M. Shi, Y. Yuan, Y. Zhu, J. Wang, Z. Kong, X. Lu and Y. Zhu, *Adv. Funct. Mater.*, 2018, **28**, 1802339.
- (17) B. Qin, Y. Li, H. Fu, H. Wang, S. Chen, Z. Liu and F. Peng, *ACS Appl. Mater. Inter.*, 2018, **10**, 20530-20539.
- (18) T. N. Huan, N. Ranjbar, G. Rouse, M. Sougrati, A. Zitolo, V. Mougel, F. Jaouen

and M. Fontecave, *ACS Catal.*, 2017, **7**, 1520-1525.

(19) M. B. Ross, C. T. Dinh, Y. Li, D. Kim, P. De Luna, E. H. Sargent and P. Yang, *J. Am. Chem. Soc.*, 2017, **139**, 9359-9363.

(20) Z. B. Hoffman, T. S. Gray, K. B. Moraveck, T. B. Gunnoe and G. Zangari, *ACS Catal.*, 2017, **7**, 5381-5390.

(21) B. Kumar, J. P. Brian, V. Atla, S. Kumari, K. A. Bertram, R. T. White and J. M. Spurgeon, *ACS Catal.*, 2016, **6**, 4739-4745.

(22) H. Xie, S. Chen, F. Ma, J. Liang, Z. Miao, T. Wang, H. -L. Wang, Y. Huang and Q. Li, *ACS Appl. Mater. Inter.*, 2018, **10**, 36996-37004.
